# Supplementary material for: Preparation of Ceramic Fiber Threads with Enhanced Abrasion Resistance Performance
Source: MDPI journal article supplement (doi:10.3390/ma17030599), 2024-01-26
Supplement: s1 [file s1]

# Preparation of Ceramic Fiber Threads with Enhanced Abrasion Resistance Performance

Xueying Zhang, Feng Hou \*, Haiyan Du, Liwen Yan, Anran Guo, Xiaohui Ma and Jiachen Liu \*

Key Laboratory of Advanced Ceramics and Machining Technology of Ministry of Education, School of Materials Science and Engineering, Tianjin University, Tianjin 300072, China; zxy\_92@163.com (X.Z.); hydu@tju.edu.cn (H.D.); lwyan@tju.edu.cn (L.Y.); arguo@tju.edu.cn (A.G.); xiaohuima@tju.edu.cn (X.M.)

\* Correspondence: houf@tju.edu.cn (F.H.); jcliutju@tju.edu.cn (J.L.)

**Table S1.** More details of HDI-WPU and IPDI-WPU.

| Type of modifier | Concentration (%) | Particle size $d_{50}$ | Tensile strength | Elongation |
|------------------|-------------------|------------------------|------------------|------------|
|                  |                   | ( $\mu\text{m}$ )      | (MPa)            | (%)        |
| HDI-WPU          | 30                | 0.110                  | >20              | >900       |
| IPDI-WPU         | 30                | 0.108                  | >15              | >700       |

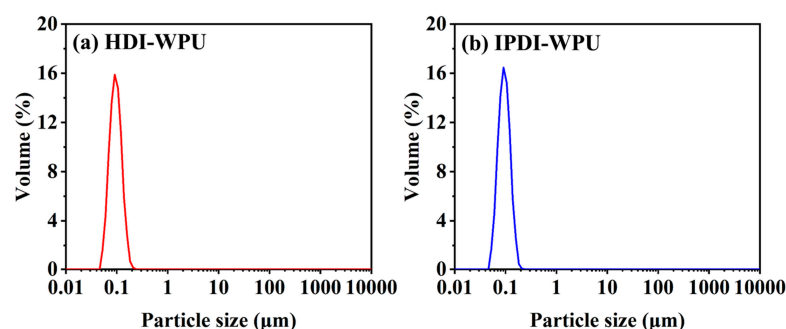

**Figure S1.** Particle size distributions of HDI-WPU dispersion(a) and IPDI-WPU dispersion(b).

The particle size and distribution of the HDI-WPU and IPDI-WPU particles were measured and analyzed by a laser particle analyzer (Malvern 2000, UK) at ambient temperature.

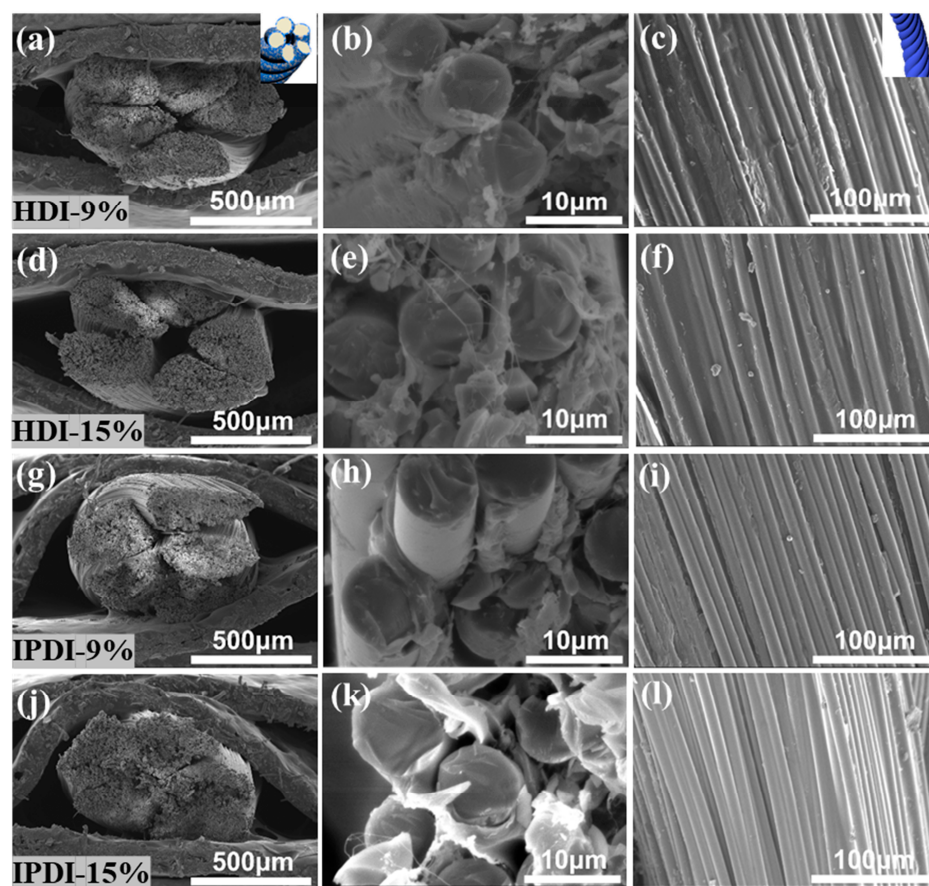

**Figure S2.** SEM images of ceramic fiber threads modified with HDI-WPU (a)-(f) and IPDI-WPU (g)-(l) at concentrations of 9% and 15%.

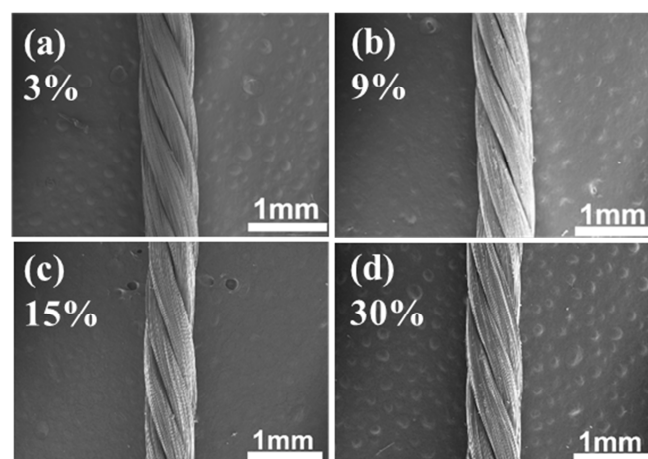

**Figure S3.** SEM images of ceramic fiber threads modified with HDI-WPU at concentrations of (a) 3%, (b) 9%, (c) 15% and (d) 30%.

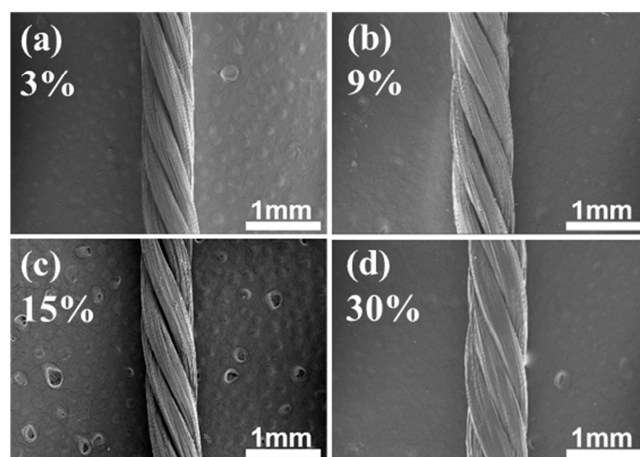

**Figure S4.** SEM images of ceramic fiber threads modified with IPDI-WPU at concentrations of (a) 3%, (b) 9%, (c) 15% and (d) 30%.

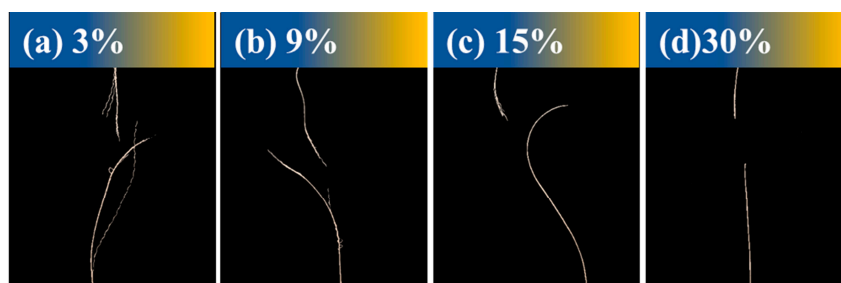

**Figure S5.** Photographs of the friction fracture area of the IPDI-WPU-modified ceramic fiber threads with concentrations of (a) 3%, (b) 9%, (c) 15% and (d) 30%.
